# Supplementary material
Source: Springer Nature journal article supplement (https://www.springermedizin.de/resource/supplementary/12905_2009_190_MOESM5_ESM.pdf/9518138)

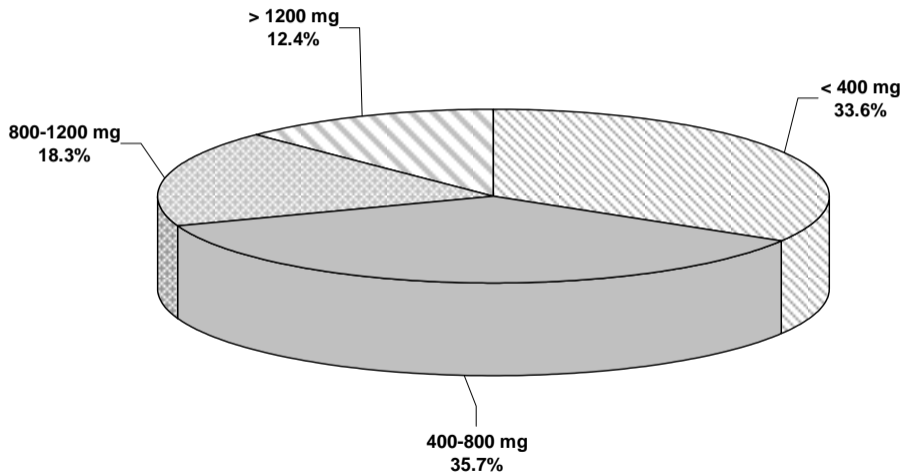

Supplement: MOESM5 [file 9518138]
